# Supplementary material for: Prevalence of Iron Deficiency, Iron Deficiency Anaemia and General Anaemia in Male Gambian Blood Donors Residing in Greater Banjul Region
Source: bioRxiv or medRxiv preprint supplement (doi:10.1101/2021.01.25.21249996), 2021-01-26
Supplement: Supplementary file [file media-1.pdf]

3 February 2014

Mr Ameh James  
Clinical Laboratories Manager  
Disease Control and Elimination Theme  
MRC Unit, The Gambia  
Fajara

Dear Mr James

**SCC 1360v2, Haematological and clinical chemistry profile in apparently healthy Gambian Adults: in search of reference intervals**

Thank you for submitting the revised participant information sheet as requested by the Gambia Government/MRC Joint Ethics Committee at its meeting held on 29 November 2013.

I am happy to record our Committee's full approval for the commencement of this study.

With best wishes

Yours sincerely



Mr Malamin Sonko  
Chairman, Gambia Government/MRC Joint Ethics Committee

**Additional documents submitted for review:-**

- Participant Information Sheet, Version 2.0 – 25 January 2014
- Consent Form, Version 2.0 – 25 January 2014
- Questionnaire
- CV-Ameh James

**The Gambia Government/MRC Joint Ethics Committee:**

*Mr Malamin Sonko, Chairman*  
*Professor Ousman Nyan, Scientific Advisor*  
*Ms Naffie Jobe, Secretary*  
*Mrs Tulai Jawara-Ceesay*  
*Dr Ahmadou Lamin Samateh*  
*Dr Roddie Cole*

*Professor Tumani Corrah*  
*Dr Stephen Howie*  
*Dr Kalifa Bojang*  
*Dr Ramatoulie Njie*  
*Dr Adama Demba*  
*Dr Siga Fatima Jagne*
